# Supplementary material for: P2X7 receptor antagonism modulates IL-1β and MMP9 in human atherosclerotic vessels
Source: PubMed Central journal article supplement (PMC5501842; doi:10.1038/s41598-017-05137-y), 2017-07-07

## **Supplementary material**

### **P2X7 receptor antagonism modulates IL-1 $\beta$ and MMP9 in human atherosclerotic vessels**

Maria Lombardi <sup>† 1</sup>, Maria Elena Mantione <sup>† 1</sup>, Domenico Baccellieri <sup>2</sup>, David Ferrara <sup>2</sup>,  
Renata Castellano <sup>2</sup>, Roberto Chiesa <sup>2</sup>, Ottavio Alfieri <sup>2</sup>, Chiara Foglieni <sup>\*</sup>

**Table I. P2X7-related machinery: correlation between vascular gene expression**

| <b>IMA Number of XY Pairs=11</b>        |                   |                                |                             |                                             |
|-----------------------------------------|-------------------|--------------------------------|-----------------------------|---------------------------------------------|
|                                         | <b>Spearman r</b> | <b>95% confidence interval</b> | <b>P value (two-tailed)</b> | <b>correlation significant (alpha=0.05)</b> |
| <b>P2X7 vs. MMP9</b>                    | 0.4312            | -0.2470 to 0.8259              | 0.1826                      | No                                          |
| <b>P2X7 vs. IL-1<math>\beta</math></b>  | 0.2569            | -0.4226 to 0.7515              | 0.4348                      | No                                          |
| <b>P2X7 vs. NLRP3</b>                   | 0.7798            | 0.3198 to 0.9423               | 0.0064                      | Yes                                         |
| <b>IL-1<math>\beta</math> vs. MMP9</b>  | 0.4818            | -0.1861 to 0.8452              | 0.1375                      | No                                          |
| <b>IL-1<math>\beta</math> vs. NLRP3</b> | 0.5182            | -0.1389 to 0.8585              | 0.1072                      | No                                          |
| <b>NLRP3 vs. MMP9</b>                   | 0.2               | -0.4706 to 0.7242              | 0.5574                      | No                                          |
| <b>PL (Number of XY Pairs=25)</b>       |                   |                                |                             |                                             |
|                                         | <b>Spearman r</b> | <b>95% confidence interval</b> | <b>P value (two-tailed)</b> | <b>correlation significant (alpha=0.05)</b> |
| <b>P2X7 vs. MMP9</b>                    | 0.5308            | 0.1595 to 0.7705               | 0.0063                      | Yes                                         |
| <b>P2X7 vs. IL-1 <math>\beta</math></b> | 0.4023            | -0.003926 to 0.6946            | 0.0462                      | Yes                                         |
| <b>P2X7 vs. NLRP3</b>                   | 0.4754            | 0.08646 to 0.7386              | 0.0163                      | Yes                                         |
| <b>IL-1<math>\beta</math> vs. MMP9</b>  | 0.6977            | 0.4074 to 0.8599               | 0.0001                      | Yes                                         |
| <b>IL-1<math>\beta</math> vs. NLRP3</b> | 0.6223            | 0.2899 to 0.8207               | 0.0009                      | Yes                                         |
| <b>NLRP3 vs. MMP9</b>                   | 0.7546            | 0.5030 to 0.8883               | < 0.0001                    | Yes                                         |

**Table II. Baseline clinical characteristics of patients undergoing carotid endarterectomy**

|                                                           | <b>(n = 69)</b> |
|-----------------------------------------------------------|-----------------|
| age (years)                                               | 70±17 *         |
| sex (M/F)                                                 | 50/19           |
| % stenosis                                                | 74(63-100) **   |
| carotid (dx/sx)                                           | 37/32           |
| <i>controlateral operated carotid artery.</i>             | 18              |
| <b>Major risk factors (n)</b>                             |                 |
| pregressed acute myocardial infarction / ICTUS (>6months) | 12              |
| hypertension                                              | 56              |
| coronary artery diseases / heart failure                  | 12              |
| peripheral artery diseases / cerebral vasculopathies      | 11              |
| dyslipidemia                                              | 32              |
| smocking status (no/yes/ex)                               | 50/10/9         |
| <b>Medications (n)</b>                                    |                 |
| statins                                                   | 48              |
| antiaggregants                                            | 61              |
| β-blockers                                                | 32              |
| ACE inhibitors / sartans                                  | 34              |

\* Mean+SD; \*\* Media (range)

**Table III. Baseline clinical characteristics of patients  
undergoing CABG**

|                                                                | <b>(n = 14)</b> |
|----------------------------------------------------------------|-----------------|
| age (years)                                                    | 64±19 *         |
| sex (M/F)                                                      | 12/2            |
| BMI                                                            | 28.6±3.1        |
| <b>Major risk factors (n)</b>                                  |                 |
| smocking status (no/yes/ex)                                    | (8/3/3)         |
| positive family history of acute myocardial infarction / ICTUS | 2               |
| hypertension                                                   | 8               |
| dyslipidemia                                                   | 8               |
| angina                                                         | 4               |
| pregressed acute myocardial infarction                         | 2               |
| peripheral artery diseases                                     | 1               |
| <b>Medications (n)</b>                                         |                 |
| statins                                                        | 12              |
| antiaggregants                                                 | 13              |
| β-blockers                                                     | 11              |
| ACE inhibitors                                                 | 6               |
| diuretics                                                      | 12              |

\*Mean+SD

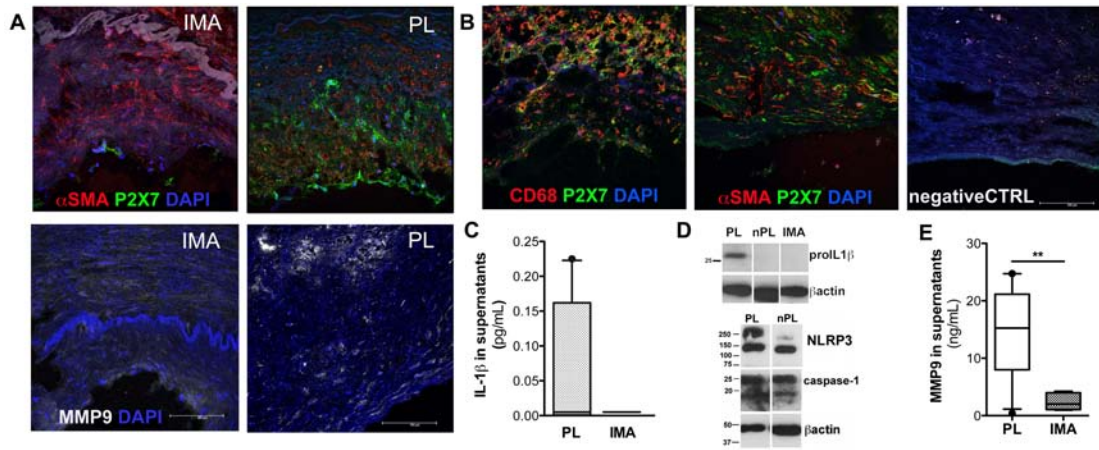

**Figure 1. Characterization of ex-vivo cultures: PL, nPL and IMA**

Confocal microscopy 2D free projection max images from 10 $\mu$ m-thick cryosections of PL and IMA display the tissue distribution of P2X7 (green), MMP9 (white) and  $\alpha$ -SMA (red) molecules; nuclei were stained with DAPI (blue) (**A**). Confocal images of the same region of intima in three sequential sections from another PL display the localisation of P2X7 (green) in double labelling either with CD68 or  $\alpha$ -SMA molecules (red) and the negative control without primary antibodies; nuclei were stained with DAPI (blue) (**B**). Quantification of IL-1 $\beta$  released into culture supernatants of PL and IMA is plotted (**C**). Representative cropped western blots show pro IL-1 $\beta$  in PL, nPL and IMA (**D, top**), NLRP3 and caspase-1 in PL and nPL (**D, bottom**). Quantification of MMP9 content into supernatants of cultured PL and IMA is presented (**E**). Values are shown as boxes with whiskers 5-95 percentile ( $\bullet$  indicates outlier); Mann Whitney test is applied. Significant difference is shown as \*\*  $p < 0.01$ .

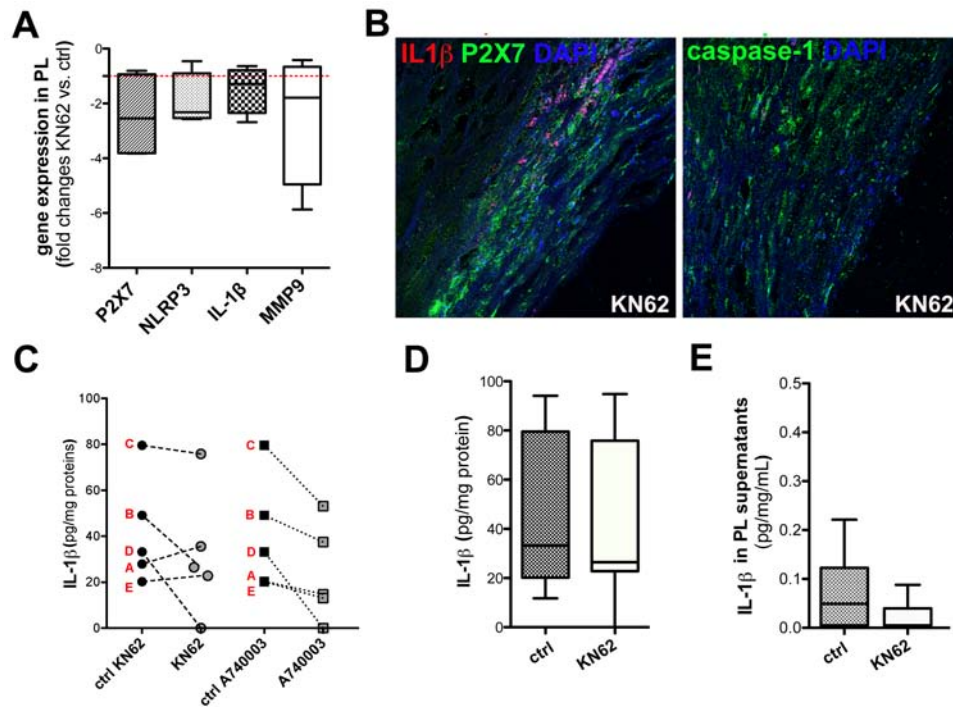

**Figure II. KN62 effect on ex-vivo cultured PLs**

P2X7, NLRP-3, IL-1 $\beta$ , MMP9 mRNA expression by real-time PCR in PLs after KN62 treatment is shown (A). Dotted red line indicates ctrl level. Representative confocal microscopy 2D free projection max images of intima from another fragment of the same PL than in Figure 3C treated with KN62 display the localization of P2X7 (green), IL-1 $\beta$  (red) (B, left) and caspase-1 (green) (B, right); nuclei are stained with DAPI (blue). Quantification of IL-1 $\beta$  content in a subset of PLs whose fragments are untreated (ctrl), treated with KN62 or with A740003 is plotted in C. Letters indicates fragments from the same vessel. IL-1 $\beta$  content in tissue extracts (D) and in culture supernatants (E) from PLs (n=8) untreated (ctrl) or treated with KN62 are displayed. Values are shown as boxes with whiskers 5-95 percentile.

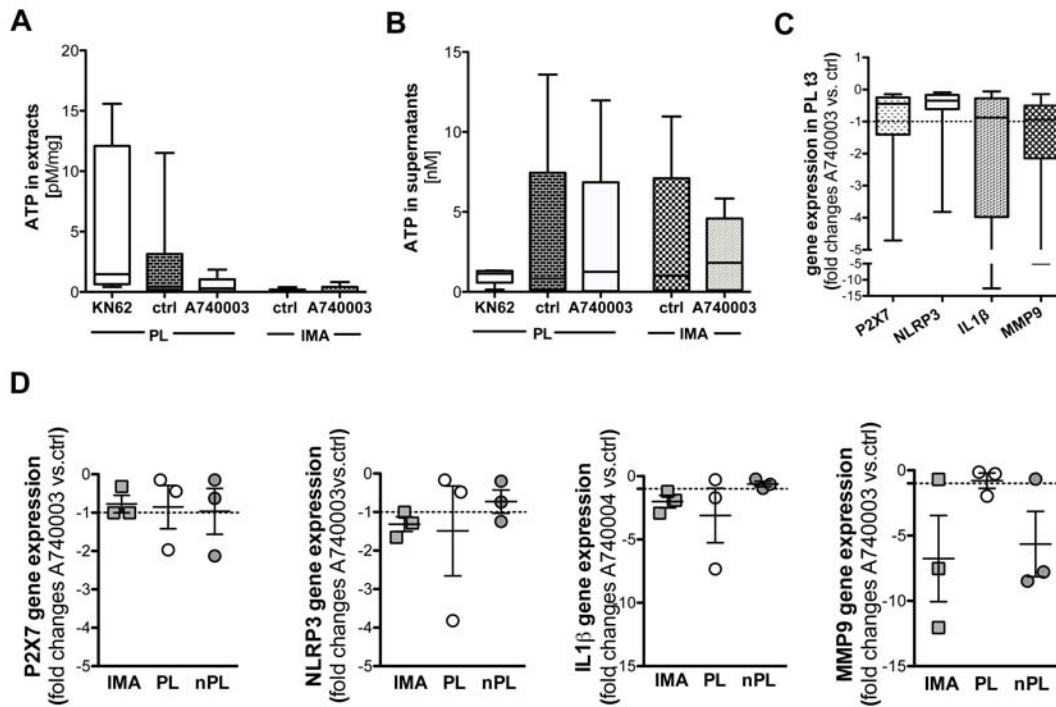

**Figure III. A740003 effect on ex-vivo cultured arteries**

Quantification of ATP amount into PL and IMA tissue extracts (**A**) and supernatants (**B**) cultured in the absence of treatment (ctrl) or in the presence of treatment with either A740003 or KN62 is presented. The mRNA expression level of P2X7, NLRP-3, IL-1 $\beta$  and MMP9 by real-time PCR in PL after 72h of treatment with A740003 is shown (**C**). Boxes are shown with whiskers 5-95 percentile. The mRNA expression quantified in IMA (n=3) and in a subset of carotid arteries (n=3) with both PL (bearing plaque) and nPL (without plaque) fragments is displayed (**D**). Mean from 3 replicates of the same sample corresponds to each symbol. In scatter dot plots the median with interquartile range is presented. Dotted line indicates ctrl level in **C, D**.

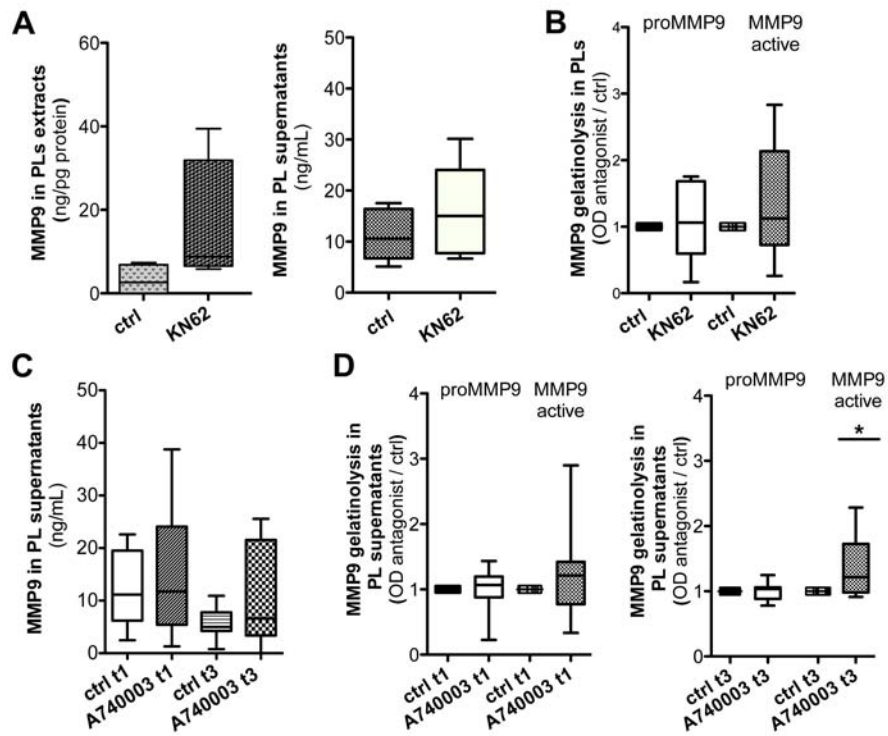

#### Figure IV. Effects of P2X7 antagonists on MMP9

Effect of treatment with KN62 on MMP9 content (A) in PL tissue extracts and supernatants and on MMP9-related gelatinolytic activities in PL tissue extracts (B) is shown. MMP9 content (C) and gelatinolytic activities (D) in supernatant of PL treated with A740003 are presented. Values are shown as boxes with whiskers 5-95 percentile. Significant differences are shown as \*  $p < 0.05$



human carotid plaque

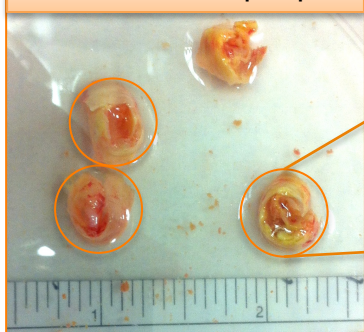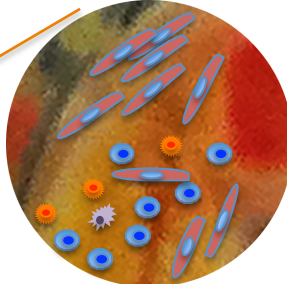

tissue culture

CTRL

\* A740003 24h

\* A740003 72h

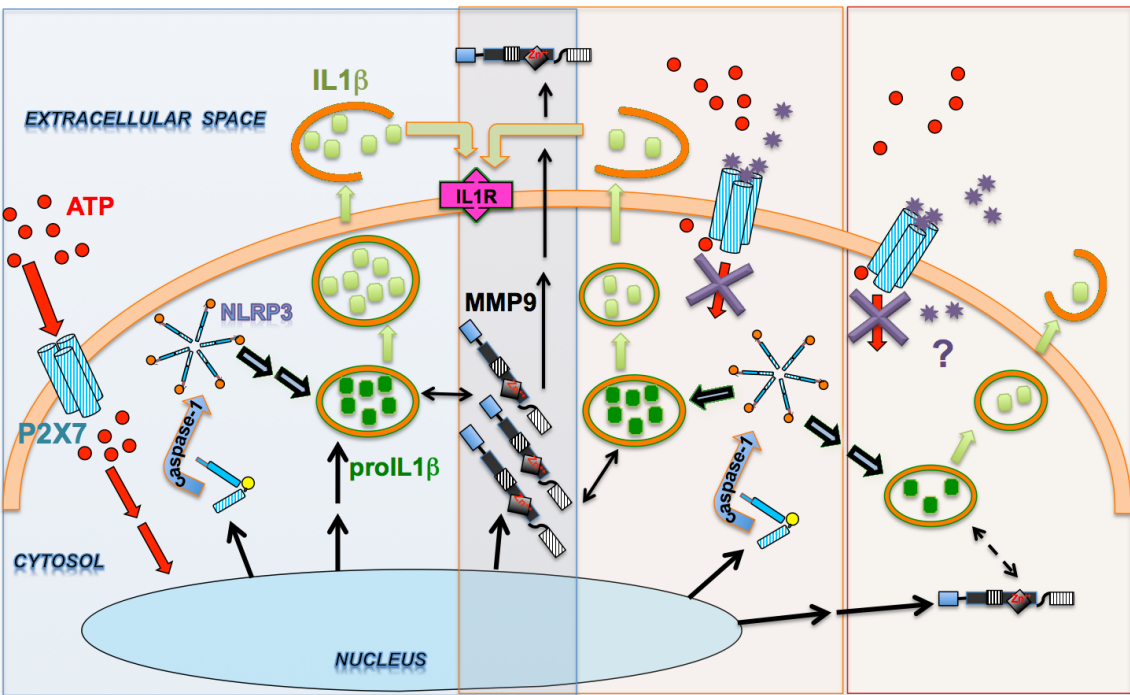

Supplement: 41598_2017_5137_MOESM1_ESM.pdf [file 41598_2017_5137_MOESM1_ESM.pdf]
